# Supplementary material for: Neuroprotective protein hydrolysates from hemp (Cannabis sativa L.) seeds
Source: Royal Society of Chemistry journal article supplement (doi:10.1039/c9fo01904a), 2019-01-01
Supplement: c9fo01904a1.pdf [file c9fo01904a1.pdf]

**Supplementary Table 1.** Sequence and GenBank accession number of oligonucleotides used in RT-qPCR.

| <b>Target</b>                  | <b>GenBank accession number</b> | <b>Direction</b>   | <b>Sequence (5'→3')</b>                      |
|--------------------------------|---------------------------------|--------------------|----------------------------------------------|
| <i>TNF-<math>\alpha</math></i> | NM_013693.3                     | Forward<br>Reverse | GAGTTGGACCCTGAGCCATA<br>AGTCCGGGCAGGTCTACTTT |
| <i>IL-1<math>\beta</math></i>  | NM_008361.4                     | Forward<br>Reverse | AGCTCATATGGGTCCGACAG<br>GACCTTCCAGGATGAGGACA |
| <i>IL-6</i>                    | NM_031168.2                     | Forward<br>Reverse | TCCACGATTTCCCAGAGAAC<br>AGTTGCCTTCTTGGGACTGA |
| <i>IL-10</i>                   | NM_010548.2                     | Forward<br>Reverse | CATTCCCAGAGGAATTGCAT<br>CCAGGGAGATCCTTTGATGA |
| <i>GAPDH</i>                   | NM_001289726                    | Forward<br>Reverse | AACTTTGGCATTGTGGAAGG<br>ACACATTGGGGGTAGGAACA |
| <i>HPRT</i>                    | NM_013556.2                     | Forward<br>Reverse | TATGTCCCCCGTTGACTGAT<br>TGCTCGAGATGTCATGAAGG |
